1 **Title: Effectiveness of mHealth Interventions for Blood Pressure**

2 **Control among Vulnerable Populations: A Systematic Review**

3 Kristen M.J. Azar, RN, MSN/MPH,<sup>1,2</sup> Yael Zoken, BS,<sup>3</sup> Rhonda M. Cooper-DeHoff,  
4 Pharm.D, MS,<sup>4</sup> Valy Fontil, MD, MAS, MPH,<sup>5</sup> Madelaine, F. Modrow,<sup>5</sup> Catherine Nasrallah,  
5 MPH, CHES,<sup>6</sup> Mark J. Pletcher, MD, MPH<sup>5</sup>

6 <sup>1</sup>Sutter Health-Center for Health Systems Research (CHSR)

7 <sup>2</sup>Sutter Health- Institute for Advancing Health Equity (IAHE)

8 <sup>3</sup>Sackler School of Medicine, New York

9 <sup>4</sup>University of Florida, College of Pharmacy

10 <sup>5</sup>University of California, San Francisco, School of Medicine (UCSF)

11 <sup>6</sup>University of California, San Francisco, Department of Medicine (UCSF)

12 Corresponding author: Kristen M.J. Azar, RN, MSN/MPH; [azark@sutterhealth.org](mailto:azark@sutterhealth.org)

13

14 **Word Count:** 4,253

## 15 **Abstract**

16 Social determinants of health and sociodemographic differences place some individuals at  
17 higher risk for hypertension leading to persisting disparities. While mobile health (mHealth)  
18 offers a promising approach to facilitate blood pressure (BP) management, it remains unclear  
19 which interventions are most effective for addressing disparities in hypertension control. We  
20 reviewed the current literature to examine whether mHealth interventions for BP control are  
21 effective in improving BP control in populations vulnerable to disparities in hypertension.  
22 We conducted a systematic review using multiple databases from January 1, 2009 through  
23 December 31, 2020. For inclusion, participants must have elevated blood pressure and belong  
24 to a sociodemographic group with known disparities in hypertension. We also tracked  
25 specific characteristics of each intervention. Out of the eight articles that met our eligibility  
26 criteria for inclusion, five were published in 2018 to 2020. Only four demonstrated a  
27 significant reduction in BP and all those interventions incorporated care teams. Despite some  
28 evidence of the effectiveness of mHealth interventions for improving BP control among  
29 vulnerable groups, more effective interventions are needed, and the quality of studies is  
30 overall low. Further research is needed to find the most effective ways to engage diverse  
31 communities with mHealth solutions to improve BP control.

## 32 **Keywords**

33 Hypertension, disparities, health IT, mHealth, public health, blood pressure, cardiovascular  
34 disease

## 35 **Funding Details**

36 The research reported in this publication was supported by Patient-Centered Outcomes  
37 Research Institute (PCORI) [PaCR-2017C2-8153]. The content is solely the responsibility of  
38 the authors and does not necessarily represent the official views of BPTrack/PCORI

## 39 **Competing Interests**

40 Mark J. Pletcher, MD, MPH has received research grants from the Patient-Centered  
41 Outcomes Research Institute (PCORI). All the other authors declare that there is no conflict  
42 of interest regarding the publication of this paper.

## 43 **Data Availability**

44 The data used to support the findings of this study are available from the corresponding  
45 author upon request.

## 46 **Introduction**

47 Uncontrolled blood pressure (BP) causes over 450,000 deaths per year in the United States  
48 (US), making it a leading preventable cause of death.<sup>1,2</sup> While national data indicate that BP  
49 control rates in the U.S. have improved over time, from approximately 30% in the early  
50 1990's to 50% in more recent years,<sup>3,4</sup> a recent study published in the Journal of the  
51 American Medical Association revealed that HTN control has declined to 43.7% in 2017-  
52 2019, and further among minoritized groups.<sup>3</sup> Further, race/ethnic and socioeconomic

53 disparities exist, with African American (AA) individuals and those with low-income status  
54 being at higher risk for uncontrolled HTN.<sup>5</sup> In communities with low socioeconomic and  
55 resource, the adverse cardiovascular outcomes of HTN and challenges of self-management  
56 are more severe due to social determinants such as low health literacy, lack of access to  
57 quality health care, and lack of trust in health care professionals and institutions.<sup>6</sup>

58 A growing body of evidence supports the use of mobile health (mHealth) interventions for  
59 health promotion, behavior change, diagnosis, and self-management of risk factors for  
60 chronic HTN. MHealth can be defined as “medical and public health practice supported by  
61 mobile devices such as mobile phones, patient monitoring devices, personal digital assistants,  
62 and other wireless devices”.<sup>7,8</sup> It is estimated that more than 90% of U.S. adults own a mobile  
63 phone, including 83% AA and 76% of individuals with a low with low-income status, and  
64 approximately 85% have a smartphone.<sup>9</sup> The use of mHealth interventions is increasing  
65 substantially in the general population given the near ubiquity of smartphone and mobile  
66 health technologies in all segments of society.<sup>10</sup> The integration of mHealth technology (i.e.  
67 home BP monitoring devices and smartphone apps) with electronic health record (EHR) data  
68 has the potential to provide a major mechanism for interventions for BP management. It is  
69 becoming increasingly feasible to help patients self-manage their HTN remotely, allow  
70 patients to engage and benefit from the comfort of their home environments and  
71 communities. Self-management tools are designed to facilitate autonomy in self-  
72 management, augment patient/clinician collaboration, and to enhance patient  
73 empowerment.<sup>11</sup>

74 While mHealth has been shown to be effective in reducing CVD risk for affluent and well-  
75 resourced patient populations<sup>12,13</sup>, it is unclear how effective these interventions are among  
76 underserved and socioeconomically vulnerable populations, given existing health and  
77 healthcare disparities. Several studies provide evidence of the positive impact of mHealth on  
78 patient adherence with HTN medication regimens.<sup>14</sup> and there is limited evidence to support  
79 the potential for mHealth to improve HTN outcomes among vulnerable populations, albeit  
80 the evidence is limited in part to a dearth of interventions specifically targeted to these  
81 populations. The objective of this study is to describe the characteristics of mHealth  
82 interventions and to examine whether these interventions are effective for reducing systolic  
83 and/ or diastolic blood pressure for socioeconomically vulnerable populations (e.g.  
84 socioeconomic or race/ethnic groups shown to have higher prevalence of hypertension).

## 85 **Materials and Methods**

### 86 **Review Design and Study Selection**

87 We conducted a systematic review to assess effectiveness of mHealth interventions for BP  
88 management among individuals with elevated BP in socioeconomically vulnerable  
89 populations. This review was registered in advance on PROSPERO under study number  
90 CRD42020169115.<sup>15</sup> We followed the Preferred Reporting Items for Systematic Reviews and  
91 Meta-Analyses (PRISMA) guidelines for conducting and reporting items for systematic  
92 reviews.<sup>16</sup>

93 We used the PICOS terminology to frame this work. Participants are those with suboptimal  
94 BP who belong to a socioeconomic group with known disparities in hypertension.  
95 Interventions of interest are experimental or quasi-experimental mHealth intervention studies

96 to reduce BP. The main comparators are usual care or other non-mHealth interventions for  
97 BP management. The primary outcome of interest is reduction in systolic and/or diastolic BP.

## 98 **Search Strategy**

99 We searched the following databases for primary studies: MEDLINE® via PubMed,  
100 PsychInfo, CINAHL® and EMBASE from January 1, 2009, through December 31, 2020. We  
101 limited the search to studies occurring after 2009 given the significant advances in mHealth  
102 technology over the past decade. We developed a search strategy for MEDLINE, accessed  
103 via PubMed®, based on medical subject headings (MeSH®) terms and text words of key  
104 articles that we identified a priori (Appendix 1). Our basic search concepts were “mHealth  
105 AND hypertension”. We first identified potentially eligible studies based on title and abstract.  
106 One reviewer (KMJA) reviewed the titles and abstracts based on pre-specified  
107 inclusion/exclusion criteria. Two reviewers (KMJA and YL) independently reviewed the  
108 papers identified for full text review using a standardized data extraction form electronically  
109 entered into a web-based survey tool (Appendix 2). The full text of the final studies were then  
110 reviewed by a third researcher (MP). All discrepancies were resolved by consensus.

## 111 **Study Selection**

112 Study Characteristics. We included interventions that assessed BP self-management using  
113 mHealth in the U.S., Canada, Western Europe or Australia for hypertension management in  
114 our target population as defined below. Studies were included if they were of experimental or  
115 quasi-experimental design, assessed the primary outcome of reduction in systolic and/or  
116 diastolic BP at least 3 months post-baseline and were published in English. Studies were  
117 excluded if the primary outcome was specifically related to ocular hypertension or pulmonary  
118 hypertension. Studies with a primary outcome of medication adherence were excluded.  
119 Studies that were non-experimental in design were excluded, as were studies published only  
120 as abstracts.

121 Target population. Adults (age 18+) with evidence of elevated BP at baseline (i.e.  
122 documented evidence of systolic BP  $\geq$  130 mmHg and/or diastolic BP  $\geq$  80 mmHg) and  
123 meeting criteria for socioeconomic and racial/ethnic vulnerability relative to bearing  
124 disproportionate risk for uncontrolled HTN.<sup>17</sup> Studies were included if study participants had  
125 < 50% non-Hispanic White, with > 50% high school education or less, with > 50% Medicaid  
126 or > 50% annual household income  $\leq$  \$50K, and/or a primarily and explicitly defined rural  
127 population. Studies were excluded if the patient population included individuals with a life-  
128 threatening co-morbid illness (i.e. cancer diagnosis, end stage renal or liver disease) or  
129 pregnant women.

130 Intervention Inclusion/Exclusion. We include technology-enabled or enhanced interventions  
131 that specifically utilize mHealth. The Global Observatory for eHealth of the World Health  
132 Organization defines mHealth as “medical and public health practice supported by mobile  
133 devices, such as mobile phones, patient monitoring devices, personal digital assistants, and  
134 other wireless devices”,<sup>18</sup> or the use of these technologies for health services and  
135 information.<sup>19</sup> Given this definition, eligible interventions must include wearables and/or  
136 devices connected to an app, mobile site and/or mobile internet via wireless connection (e.g.  
137 Wi-Fi, blue tooth etc.). The intervention must be intended to reduce systolic and/or diastolic  
138 BP as the primary outcome of interest. Additionally, the intervention must be remote (i.e.  
139 used outside of the clinic setting) and patient-facing (i.e. patient interfaces and uses the

140 technology outside of the clinic setting), but may include a clinic-based component. We also  
141 excluded studies with interventions requiring a surgical or invasive component (i.e. implanted  
142 or internal BP monitor).

### 143 **Data Extraction and Quality (Risk of Bias) Assessment**

144 Data were systematically extracted and summarized. We reported study characteristics and  
145 intervention characteristics, using categories to describe components of included studies to  
146 facilitate cross-study comparisons. Primary outcomes were reported for all studies.  
147 Secondary outcomes (i.e. medication adherence) were reported for studies that included these  
148 outcomes using the metric utilized by the original study.

149 All three researchers (KMJA, YL and MP) independently assessed the risk of bias of the  
150 eight included studies using the Cochrane Risk of Bias tool. The specific domains include  
151 random sequence generation, allocation concealment, blinding, incomplete outcome data,  
152 selective reporting, and other source of bias. Any disagreement will be resolved by discussion  
153 between the three reviewers.

## 154 **Results**

### 155 **Identification of Studies and Study Selection**

156 We identified 2,574 articles through the literature search. After excluding duplicates, 2,023  
157 articles were screened for inclusion based on title and abstract. Of these, 255 abstracts were  
158 review by one research (KJA) to identify manuscripts requiring a full text review. Two  
159 researchers (KJA & YFZ) independently assessed 74 full-text papers for eligibility and both  
160 authors agreed to exclude 66 articles based on the established protocol and criteria. The  
161 remaining 8 articles were identified as meeting the eligibility criteria for inclusion and were  
162 then reviewed by a third researcher (MP) for confirmation. Reasons for exclusion of the 66  
163 full-text articles are indicated by the PRISMA diagram (Figure 1).

164

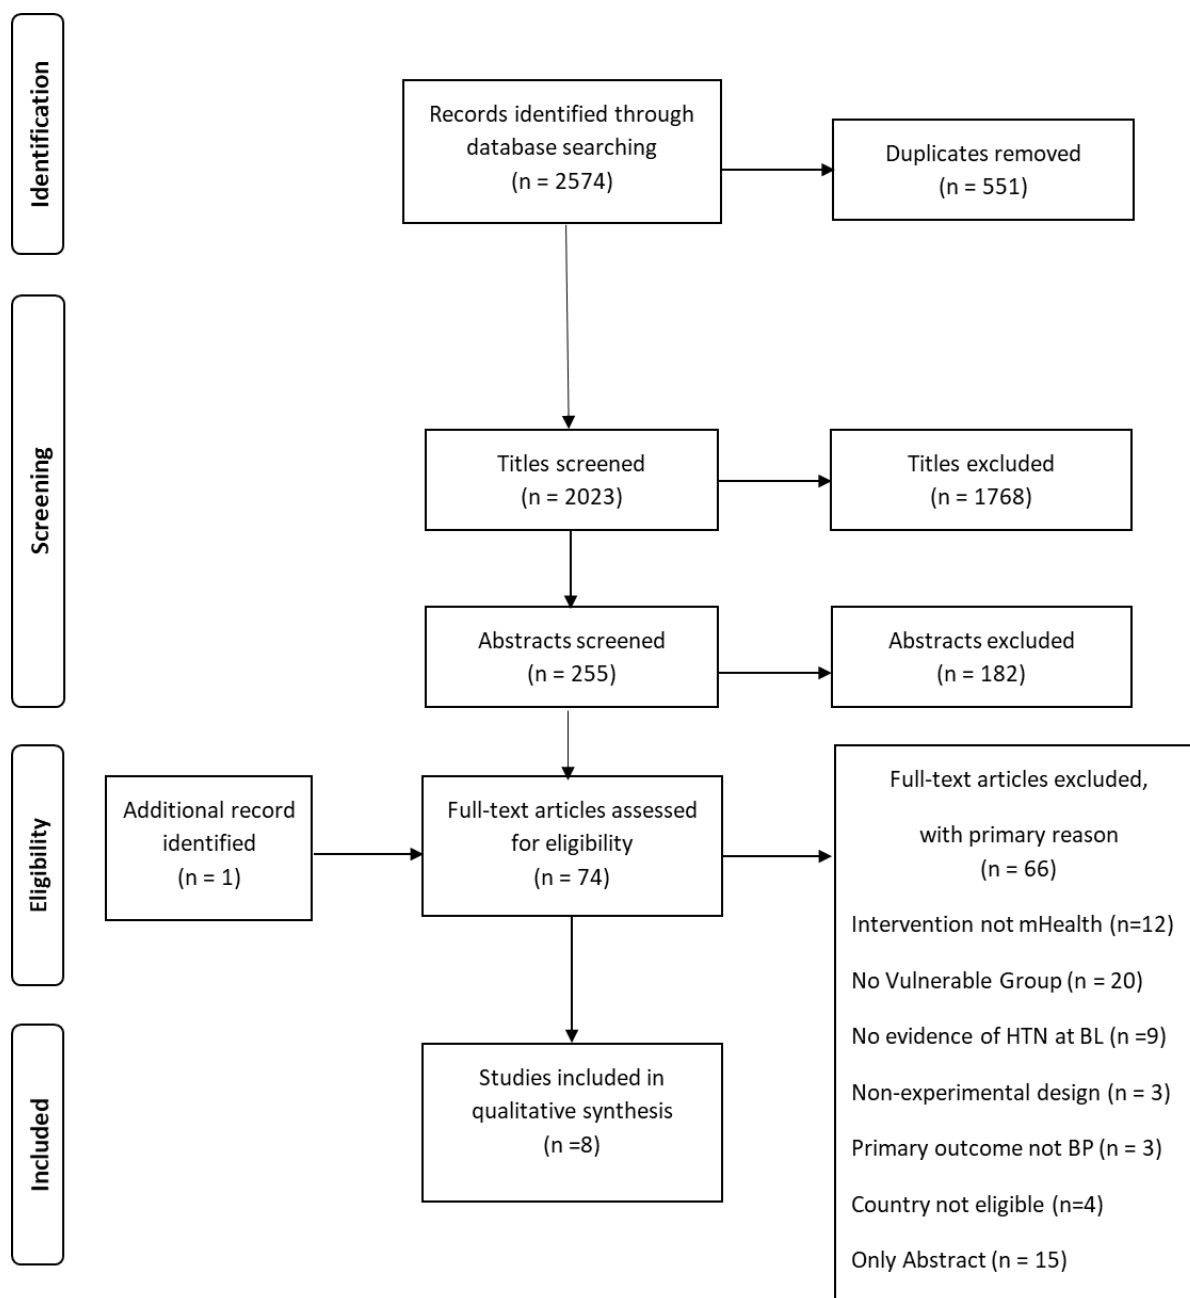

165

166

Figure 1: PRISMA Diagram

## 167 Study Characteristics, Design and Setting

168 Characteristics of the eight studies are presented in Table 1. Of the eight studies identified for  
 169 inclusion, six were published since 2017, six were conducted in the United States, one in the  
 170 United Kingdom<sup>20</sup> and one in Canada.<sup>21</sup> All eight studies were randomized control trials with  
 171 follow-up ranging from 3 to 12 months. Half of the studies compared the mHealth  
 172 intervention to usual care<sup>20,22-24</sup>, three used an enhanced usual/standard care group and one  
 173 involved a passive intervention as the comparison group.<sup>21</sup>

Table 1: Study Design, Quality, and Participant Characteristics

| Author and Year       | Location                                          | Duration | Design                                                                                                                              | Sample size (N) | Age (mean)                                        | Racial/Ethnic Minority (%)                                                                                    | Sex        | SES                                                                                                                                                                          | Baseline BP                                                                                                                        |
|-----------------------|---------------------------------------------------|----------|-------------------------------------------------------------------------------------------------------------------------------------|-----------------|---------------------------------------------------|---------------------------------------------------------------------------------------------------------------|------------|------------------------------------------------------------------------------------------------------------------------------------------------------------------------------|------------------------------------------------------------------------------------------------------------------------------------|
| Schroeder et al. 2020 | Albuquerque, New Mexico                           | 12-mo    | RCT<br>Arm 1 (n=148): IVR-T<br>Arm 2 (n=147): Usual Care                                                                            | 295             | 53.4 ± 11.3                                       | 25.1% AI/AN<br>4.8% Non-Hispanic Black<br>51.9% Hispanic<br>14.6% Non-Hispanic White<br>3.7% Other<br>100% AA | 40.3% Male | 60.3% Annual Household Income <\$25K/Year<br>28.1% Unemployed<br>33.6% food insecurity<br>48.3% Enrolled in SNAP<br>53.6% Not enough money for utilities<br>51.7% unemployed | SBP: 133.6 (19.5) mmHg<br>DBP: 81.5 (12.6) mmHg                                                                                    |
| Still et al, 2020     | Cleveland, Ohio                                   | 3-mo     | RCT<br>Arm 1 (n = 30): COACHMAN intervention<br>Arm 2 (n = 30): Enhanced Usual Care (EUC)                                           | 60              | 59.5 ± 8.9                                        |                                                                                                               | 25% Male   |                                                                                                                                                                              | Intervention:<br>SBP: 156.7 ± 9.5 mmHg<br>DBP: 90.5 ± 14.7 mmHg<br>Control:<br>SBP: 152.2 ± 12.2 mmHg<br>DBP: 88.1 ± 13 mmHg       |
| Chandler et al, 2019  | South Carolina                                    | 9-mo     | RCT<br>Arm 1 (n=26): Smartphone Med Adherence Stops Hypertension (SMASH) Intervention<br>Arm 2 (n=28): Enhanced standard Care (ESC) | 54              | 46.5 ± 9.9                                        | 100% Hispanic                                                                                                 | 61% male   | 72% High School or less<br>91% Income ≤\$50k/year                                                                                                                            | SBP: 151.5 mmHg<br>DBP: 85.7 mmHg                                                                                                  |
| **                    |                                                   |          |                                                                                                                                     |                 |                                                   |                                                                                                               |            |                                                                                                                                                                              |                                                                                                                                    |
| Skolarus et al, 2018  | Flint, Michigan                                   | 6-mo     | RCT<br>Arm 1 (n=46): Usual Care<br>Arm 2 (n=48): Text messages                                                                      | 94              | 58 ± 9.8                                          | 97% African American<br>3% Other                                                                              | 3% Male    | 29% Medicaid or Uninsured<br>19% Low health literacy<br>46% food insecurity                                                                                                  | Intervention:<br>SBP: 160.7 (23.6)<br>DBP: 99.0 (11.8)<br>Control:<br>SBP: 162.2 (20.5)<br>DBP: 99.2 (17.8)                        |
| Tobe et al, 2018      | 6 different communities in 3 provinces of Canada. | 12-mo    | RCT<br>Arm 1 (n=71): Active intervention<br>Arm 2 (n=71): Passive intervention                                                      | 142             | 48.7 ± 12.8 (Active) and 49.1 ± 13.1 (Passive)    | 100% Canadian Indigenous                                                                                      | 51% male   | First Nations populations living on reservations in six different communities in three provinces of Canada                                                                   | Active Intervention:<br>SBP: 143 ± 12 mmHg<br>DBP: 84 ± 12 mmHg<br>Passive Intervention<br>SBP: 145 ± 16 mmHg<br>DBP: 86 ± 10 mmHg |
| Frias et al, 2017     | California and Colorado                           | 12-WK    | RCT<br>Arm 1 (n = 40): Digital Medicine Offering (DMO) - 4 weeks                                                                    | 109             | 57.8 (SE 1.1; Combined DMO) and 61.6 (SE 1.7; UC) | 15.6% African American<br>46.8% Hispanic<br>66% Caucasian                                                     | 50% Male   | 31% High School or less<br>57% Income ≤\$20k/year                                                                                                                            | Combined DMO<br>SBP: 149.3 (1.5)<br>DBP: 86.2 (3.2)<br>Usual Care                                                                  |
| **                    |                                                   |          |                                                                                                                                     |                 |                                                   |                                                                                                               |            |                                                                                                                                                                              |                                                                                                                                    |

|                            |                                |       |                                                                                     |     |                     |                         |          |                                                                                  |                                                                         |
|----------------------------|--------------------------------|-------|-------------------------------------------------------------------------------------|-----|---------------------|-------------------------|----------|----------------------------------------------------------------------------------|-------------------------------------------------------------------------|
|                            |                                |       | Arm 2 (n = 40):<br>DMO-12 weeks                                                     |     |                     | 13.8% Asian             |          |                                                                                  | SBP: 155.4<br>DBP: 83.9                                                 |
| Davidson et al, 2015<br>** | South Carolina                 | 6-mo  | Arm 3 (n = 29):<br>Usual Care<br>RCT                                                | 38  | 47.5 ± 11.8         | 52.6 % African American | 40% Male | 58% High School or less                                                          | SBP: ~ 156 mmHg (Fig 1)                                                 |
|                            |                                |       | Arm 1 (n = 18):<br>Smartphone Med Adherence Stops Hypertension (SMASH) Intervention |     | 48.45 ± 11.32 (ESC) | 47.4% Hispanic          |          | 68% Income ≤\$50k/year                                                           | DBP: ~ 89mmHg (Fig 2)                                                   |
|                            |                                |       | Arm 2 (n = 20):<br>Enhanced Standard Care (ESC)                                     |     |                     |                         |          | 21% Unemployed                                                                   |                                                                         |
| McManus et al, 2010<br>**  | 24 general practices in the UK | 12-mo | RCT                                                                                 | 480 | 66.4 ± 9            | 96% White               | 47% Male | Subgroup analysis for low vs high Index of multiple deprivation (IMD) 2007 score | Intervention<br>SBP: 152.1 (150.6 to 153.6)<br>DBP: 85.0 (83.9 to 86.1) |
|                            |                                |       | Arm 1 (n = 234): Self-management intervention                                       |     |                     | 1.5% Black              |          |                                                                                  | Control<br>SBP: 151.8 (150.3 to 153.3)<br>DBP: 84.5 (83.3 to 85.7)      |
|                            |                                |       | Arm 2 (n = 246): Usual Care                                                         |     |                     | 2% Asian                |          |                                                                                  |                                                                         |
|                            |                                |       |                                                                                     |     |                     | 0.5% Other              |          |                                                                                  |                                                                         |



176 **Participant characteristics.** The number of participants in a given study ranged between 38  
177 and 480 individuals. For three studies, at least 50% of participants were male. Among the  
178 studies, three<sup>23,25,26</sup> had more than 50% Non-Hispanic Black participants. One study included  
179 only Hispanic participants<sup>27</sup> and another included only Canadian Indigenous groups.<sup>21</sup> In  
180 four studies<sup>22,24,25,27</sup> at least half of the participants had an annual income of  $\leq$  \$50K. One  
181 study<sup>20</sup> conducted an a priori secondary analysis for low vs high scores for the Index of  
182 Multiple Deprivation. All but one study<sup>24</sup> included participants with a baseline BP in the  
183 Hypertension Stage 2 range (SBP  $\geq$  140 mmHg and/or diastolic DBP  $\geq$  90 mmHg).<sup>17</sup>

## 184 **Intervention Characteristics**

185 We examined mHealth intervention characteristics across the eight included studies (Table  
186 2). The eight studies included seven unique interventions, given that two studies<sup>25,27</sup> tested  
187 the same intervention (i.e. Smartphone Medication Adherence Stops Hypertension  
188 [SMASH]). Five interventions were developed with direct involvement from members of a  
189 targeted vulnerable community.<sup>21,23-27</sup> More than half (n = 4; 57%) of the interventions  
190 involved the use of a smartphone and/or smartphone application (app).<sup>21,22,25-27</sup> Five  
191 interventions (71%) required remote self-monitoring with an automated sphygmomanometer  
192 (arm cuff).<sup>20,21,23,25-27</sup> While one study<sup>24</sup> did not require use of an automated  
193 sphygmomanometer, the option was offered and 98% of participants did use one. One study<sup>22</sup>  
194 utilized an ingestible sensor placed in a pill, with a wearable sensor patch intended to  
195 promote medication adherence. Three interventions offered educational content.<sup>21,24,26</sup> Three  
196 interventions used SMS and text messaging<sup>21,23,25,27</sup> to deliver tailored motivational messages,  
197 educational content and /or adherence reminders via mobile phone. Three offered  
198 visualizations for self-monitored BP metrics and longitudinal trends, adherence and tracking  
199 of other health behaviors.<sup>20,22,25,27</sup> Most interventions (n = 5; 71%)<sup>20-22,25-27</sup> involved a  
200 clinical care team, which received transmission of data and/or provided supplemental  
201 counseling.<sup>26</sup>

## 202 **Intervention Effectiveness / Results of Individual Studies**

203 Four studies<sup>20,22,25,27</sup> (including three different interventions) demonstrated a significant  
204 reduction in mean SBP and/or DBP for treatment vs comparison group participants (Table 1).  
205 Davidson et al (2015) and Chandler et al (2019) tested the SMASH intervention whereby  
206 adult participant were randomly assigned to either the SMASH group or the Enhanced  
207 standard care (ESC) group. The intervention was tested in two randomized controlled trials,  
208 one largely composed of low socioeconomic status (SES) Hispanic adults (n = 54)<sup>27</sup> and the  
209 other with low SES Hispanic and AA adults (n = 38, 53% AA and 47% Hispanic).<sup>25</sup> The  
210 intervention led to a reduction of the SBP in the SMASH group. The SMASH program  
211 involves a smartphone app to improve BP medication adherence as well as Bluetooth-enabled  
212 automated BP device. Participants were asked to measure their BP using the device and app  
213 every three days. It also facilitates timely patient-provider communication and included  
214 tailored reinforcement/motivational messages via SMS. The development of the intervention  
215 was guided by Self Determination Theory<sup>28,29</sup> and aimed to increase autonomous motivation  
216 by linking participants' behavioral changes to their values, beliefs and goals. Messages are  
217 based upon participant responses to a branch logic questionnaire that identified individual  
218 values, beliefs and short/long-term goals. The 600+ messages were developed using  
219 formative research methods among the target population (i.e. Hispanic adults with  
220 hypertension). The intervention also utilized the global systems for mobile electronic tray

221 Maya (MedMinder, Inc., Newton, MA, USA), which provided a series of reminder signals to  
222 take medications. The data was shared with the care team to inform clinical care.

Table 2: . Intervention Features and Components

| Study                         | Control                                                                                                                                                                                                           | Tech Platform        | Intervention Component |               |              |                                                                                               |                     |                  |                |       |
|-------------------------------|-------------------------------------------------------------------------------------------------------------------------------------------------------------------------------------------------------------------|----------------------|------------------------|---------------|--------------|-----------------------------------------------------------------------------------------------|---------------------|------------------|----------------|-------|
|                               |                                                                                                                                                                                                                   |                      | HTN Edu                | BP monitoring | Med reminder | Equipment provision                                                                           | Technology Training | Lifestyle advice | Human Coaching | Other |
| Schroeder et al. 2020         | Usual Care                                                                                                                                                                                                        | Phone: SMS or IVT-T  | X                      | X             | X            | X<br>98% received an optional Automated BP sphygmomanometer (arm cuff) – no data transmission |                     | X                | X              | X     |
| Still et al, 2020             | Enhanced Usual Care:<br>- Printed educational materials on HTN management<br>- Access to one web-based education session on self-monitoring BP<br>Automated BP sphygmomanometer (arm cuff) – no data transmission | Web-based<br><br>App | X                      | X             | X            | X<br>Bluetooth-enabled Automated BP sphygmomanometer (arm cuff) – no data transmission        |                     |                  | X              |       |
| Chandler et al. 2019          | Enhanced standard Care (ESC): participants received text messages including links to PDFs and brief video clips containing healthy lifestyle tips for attention control                                           | App                  | X                      | X             |              | X<br>Bluetooth-enabled automated BP sphygmomanometer (arm cuff)                               | X                   | X                | X              | X     |
| Skolarus et al. 2018          | Usual Care                                                                                                                                                                                                        | SMS                  |                        | X             |              | X<br>Automated BP sphygmomanometer (arm cuff)                                                 | X                   |                  | X              |       |
| Tobe et al. 2018              | Passive Intervention Health behaviors SMS alone (not HTN specific)                                                                                                                                                | SMS                  | X                      | X             |              | X<br>Bluetooth-enabled automated BP sphygmomanometer (arm cuff)                               |                     |                  | X              | X     |
| Frias et al. 2017             | Usual Care                                                                                                                                                                                                        | App                  |                        | X             | X            | X<br>-Wearable sensor patch<br>-Ingestible sensor in a placebo pill                           |                     |                  |                | X     |
| Davidson et al. 2015          | Enhanced standard Care (ESC): participants received text messages including links to PDFs and brief video clips containing healthy lifestyle tips for attention control                                           | Web Portal<br>App    | X                      | X             |              | X<br>Bluetooth-enabled automated BP sphygmomanometer (arm cuff)                               | X                   | X                | X              | X     |
| McManus et al. 2010           | Usual Care                                                                                                                                                                                                        | Web Based            |                        | X             |              | X<br>Automated BP sphygmomanometer (arm cuff)                                                 | X                   |                  |                |       |
| I-Modem for data transmission |                                                                                                                                                                                                                   |                      |                        |               |              |                                                                                               |                     |                  |                |       |

225 Frias et al (2017) conducted a three-arm randomized controlled trial to test the effectiveness  
226 of a digital medicine offering (DMO) among low SES adults with both type 2 diabetes and  
227 hypertension (n = 109) and found at 4 weeks compared to usual care. The intervention  
228 consisted of the use of an ingestible sensor co-capsulated with antihypertensive medication  
229 and transmitting data to an external sensor patch for medication adherence tracking.  
230 Participants used DMO (includes digital medicines, the wearable sensor patch, and the  
231 mobile device app) for 4 or 12 weeks (treatment groups 1 and 2 respectively) or received  
232 usual care (treatment group 3). DMO reports were provided to clinicians to guide decision  
233 making for medication titration. While the trial was 12-weeks, the primary outcome was  
234 mean change in SBP at 4 weeks and was found to be significantly reduced in both treatment  
235 arms compared to usual care (Table 1) and maintained at 12 weeks. Also of note, providers  
236 taking care of a patient who was randomized to DMO intervention made approximately 3  
237 times more medical decisions per participant compared to usual care.

238 McManus et al (2010) RCT (n = 480) tested the telemonitoring and self-management in the  
239 Control of Hypertension (TASMINH2) intervention and found change in mean SBP between  
240 baseline 6 and 12 months (SBP decreased by 17.6 mm Hg in the self-management group and  
241 by 12.2 mm Hg in the control group). The TASMINH2 intervention combined self-  
242 management of BP, self-titration of antihypertensive medications combined with  
243 telemonitoring of home BP measurements by the care team. Monthly summaries of the self-  
244 management data were sent to the clinical team for review and use in informing clinical care.  
245 While the intervention was web-based, it involved the passive transmission of data from the  
246 automated sphygmomanometer via i-Modem, inserted into a home electrical outlet. The  
247 analysis included a priori-defined subgroup analysis among those with low vs high Index of  
248 multiple deprivation (IMD) 2007 score. The overall reduction in SBP was greater for  
249 participants with low IMD compared with participants with high IMD 2007 at both 6 and 12  
250 months (-0.4 mm Hg; 95% CI -5.9 to 5.2, p=0.05 and 1.6 mm Hg; 95% CI -4.4 to 7.6,  
251 p=0.08 respectively). The remaining four studies<sup>21,23,24,26</sup> did not demonstrate a significant  
252 reduction in SBP and/or DBP for the treatment vs comparison group participants. Schroeder  
253 et al (2020), tested the impact of an interactive voice response and text message (IVR-T)  
254 based intervention, compared with usual care, to deliver automated appointment and  
255 medication refill reminders as well as weekly culturally tailored (i.e. AI/NA) motivational  
256 messages to encourage self-management. The authors speculate that the null findings may in  
257 part be due to study design and a large proportion of participants with hypertension being in  
258 control at baseline. Both the Skolarus et al (2018) and Still et al (2020) interventions were  
259 developed in collaboration with direct involvement from members of the African American  
260 community, using the principles of community-based participatory research. One  
261 intervention<sup>23</sup> consisted of prompted remote BP self-monitoring, tailored text-messages that  
262 are responsive to monitored data as well as both tailored and generic automated text-  
263 messages to promote healthy behaviors. The authors speculate that small sample size and  
264 low-intensity of the intervention may have contributed to null results. The other  
265 intervention<sup>30</sup> combined self-directed web-based hypertension education, remote self-  
266 monitoring and app-supported medication management along with up to 4 patient-initiated,  
267 informal nurse counseling. They speculate that the provision of home BP self-monitoring  
268 devices to both groups could have resulted in greater awareness and behavior change for all  
269 study participants. Finally, Tobe et al (2019) tested a SMS text-based intervention among  
270 members of the Canadian Indigenous Groups community with hypertension. The intervention  
271 consisted of “active” messages to promote BP self-management with “passive” messages to  
272 promote generic healthy lifestyle behaviors, compared to passive alone.

## 273 **Strength of Body of Evidence, Risk of Bias and Quality of Studies**

274 A summary of study quality, assessed via the Cochrane Risk of Bias Tool, is presented in  
 275 Table 4. No studies that met the inclusion criteria were excluded from the review on the basis  
 276 of quality. One<sup>21</sup> of the 8 studies was rated high risk for both incomplete outcome data and  
 277 selective outcome reporting. The risk of bias for these domains for the other studies was  
 278 either unknown<sup>23,26</sup> or low<sup>20,22,24,27,31</sup>. There was high or unknown risk of bias due to blinding  
 279 participants & personnel for all of the studies.

280 **Table 4: Study Quality Assessment via Cochrane Risk of Bias Tool**

| Study Information     | Random Sequence Generation | Allocation Concealment | Blinding Participants & Personnel | Blinded outcome assessment | Incomplete Outcome Data | Selective Reporting | Other Source of Bias |
|-----------------------|----------------------------|------------------------|-----------------------------------|----------------------------|-------------------------|---------------------|----------------------|
| Schroeder et al, 2020 | Unknown                    | Unknown                | High                              | Low                        | Low                     | Low                 | Low                  |
| Still et al, 2020     | Low                        | Unknown                | High                              | High                       | Unknown                 | Low                 | Low                  |
| Chandler et al, 2019  | Unknown                    | Unknown                | Unknown                           | Unknown                    | Low                     | Low                 | Unknown              |
| Skolarus et al, 2018  | Low                        | Unknown                | High                              | Low                        | Unknown                 | Unknown             | Unknown              |
| Tobe et al, 2018      | Low                        | Low                    | High                              | High                       | High                    | High                | Unknown              |
| Frias et al, 2017     | Low                        | Low                    | High                              | High                       | Low                     | Low                 | Unknown              |
| Davidson et al, 2015  | Unknown                    | Unknown                | Unknown                           | Unknown                    | Low                     | Low                 | Unknown              |
| McManus et al, 2010   | Low                        | High                   | High                              | High                       | Low                     | Low                 | Unknown              |

281

## 282 **Discussion**

283 In this systematic review we focused on mHealth interventions for BP reduction among  
 284 individuals with hypertension and belonging to socioeconomically vulnerable and high-risk  
 285 populations. We identified eight trials that met our eligibility criteria for inclusion. Four of  
 286 these studies, which incorporated care team impact, demonstrated a statistically significant  
 287 reduction in systolic BP.

288 While there have been several related systematic reviews conducted in recent years<sup>32-39</sup>, our  
 289 review includes relatively recent literature, where five of the eight studies included were  
 290 published in 2018 to 2020. One other recent review by Khoong et al.<sup>40</sup> examined the impact  
 291 of mobile health strategies for BP self-management on BP outcomes but the search was  
 292 limited to studies conducted prior to July 2019 and, thus, does not include several of those we  
 293 have identified.<sup>21,22,24,26,27</sup> Among the main findings was a need for increased diversity in  
 294 clinical research studies as well as the use of implementation science frameworks to facilitate  
 295 comparison between different multi-modal studies. Given the rapidly evolving technology,  
 296 frequent updates to reviews are justified to keep pace with these advancements. Our review  
 297 intentionally uses a broader definition of mHealth interventions for BP, where prior reviews  
 298 have limited focus only on smartphone apps<sup>32,36</sup> and/or SMS interventions<sup>34</sup> Despite

299 persistent disparities, there remains limited evidence to identify effective mHealth strategies  
300 that will benefit groups that bear a disproportionate burden of hypertension risk and its  
301 related sequelae.<sup>41</sup>

302 Overall, prior systematic reviews found mixed evidence for the effectiveness of mHealth  
303 interventions for hypertension management. A recent systematic review and meta-analysis by  
304 Li et al. (2020) aimed to measure the effectiveness of mHealth in improving the self-  
305 management of hypertension for adults and found a greater reduction in both SBP and DBP  
306 in the mHealth intervention groups compared with control groups,  $-3.78$  mm Hg ( $P < .001$ ;  
307 95% CI  $-4.67$  to  $-2.89$ ) and  $-1.57$  mm Hg ( $P < .001$ ; 95% CI  $-2.28$  to  $-0.86$ ), respectively.  
308 They found that high intensity of medication reminders, user-driven designs with customized  
309 2-way communication between patients and physicians and multifaceted functions (i.e. SMS  
310 text messaging, linking BP monitoring devices to a Web-based system, apps etc.) were  
311 associated with effectiveness. In a meta-analysis of randomized controlled trials testing  
312 interactive mHealth interventions for BP management in adults (total  $n = 4271$  participants),  
313 Lu et al (2019) found that the interventions were associated with significant changes in  
314 systolic BP and diastolic BP of  $-3.85$  mmHg and  $-2.19$  mm Hg respectively. While they  
315 found evidence of effectiveness, there was no reporting of sociodemographic characteristics  
316 of participants and only one study included<sup>22</sup> was also included in the present review.

317 Consistent with prior reviews, a common element among the effective interventions in our  
318 review seemed to be intentional involvement and communication with the care team, aimed  
319 at informing clinical decision making and medication titration. The four interventions with  
320 null results did not include a formal mechanism for information sharing with the care team  
321 and were, in general, lower intensity (i.e. no care team involvement; passive engagement) in  
322 comparison to the SMASH, DMO and TASMING2 interventions. Some early studies in  
323 home-based telemonitoring of BP, where remote self-monitored data was shared with the  
324 care team, resulted in under treatment and worse outcomes.<sup>42-44</sup> More recent evidence  
325 suggests benefit when clinical guidelines are adjusted to recommend lower targets for home  
326 readings.<sup>45,46</sup> The SMASH intervention<sup>25,27</sup> involved the generation of a biweekly report from  
327 self-monitored BP data that was used to inform clinical care and incorporated commonly  
328 available, nearly ubiquitous technologies. It is especially promising given that the results  
329 were replicated in a second study, though both studies were small ( $n < 100$ ) and potential for  
330 scalability is unclear. The Frias et al (2017) intervention used an ingestible sensor co-  
331 capsulated with antihypertensive medication, which is not a commonly available or widely  
332 used technology. The authors did not report cost data and it is unclear how feasible it would  
333 be to scale up the intervention. Additionally, the authors reported some incidence of  
334 gastrointestinal related adverse events, raising questions of safety and acceptability in a  
335 broader context. It is important to note that the TASMING2 study was conducted only in the  
336 United Kingdom and was found effective among a group identified as low SES but in the  
337 context of socialized medicine. Given this, there may be differences when deploying among  
338 socioeconomically disadvantaged groups in the U.S.

339 While health information technology has been recognized as a potentially powerful tool in  
340 addressing racial/ethnic disparities among Black communities, it is recognized that high  
341 quality research to improve the scalability and sustainability of culturally appropriate  
342 interventions is needed.<sup>47</sup> Further, deficiencies in existing interventions that do not promote  
343 equitable outcomes must be identified and mitigated.<sup>48</sup> While community-based approaches,  
344 such as barbershop and faith-based programs, have shown promise<sup>47,49</sup>, both studies in our  
345 review<sup>23,30</sup> which incorporated these types of approaches were not effective for reducing BP.

346 This could in part be due to limitations in study design (i.e. insufficient power) and also due  
347 to the low intensity of the mHealth interventions themselves.

348 Several other studies exploring mHealth interventions specifically among socioeconomically  
349 vulnerable adults were identified in our review or prior systematic reviews but did not meet  
350 our inclusion criteria and are worth noting. Buis et al (2017)<sup>14</sup> tested daily, automated text  
351 reminders sent at individually tailored times, among Black adults with uncontrolled  
352 hypertension and did not find significant differences in BP outcomes. This study was  
353 excluded due to limited follow-up. Lewinski et al (2019)<sup>50</sup> recruited patients of low  
354 socioeconomic status from a federally qualified health center with both diabetes and  
355 uncontrolled hypertension. The intervention consisted of app and text messages and did not  
356 result in improved hypertension control and did not include a comparison group. Neither of  
357 these studies involved the care team or incorporated medication management. Taber et al  
358 (2018)<sup>51</sup> aimed to assess the efficacy of a pharmacist-led, technology-aided, educational  
359 intervention and found modest systolic BP reduction among Black participants (−0.86 mmHg  
360 per month,  $p=0.026$ ), which was not evident in non-Blacks (−0.13 mmHg per month,  
361  $p=0.865$ ). This study was excluded due to a lack of comparison group. The findings in these  
362 studies are consistent with the potential importance of care team involvement for  
363 interventions aimed at reducing disparities in hypertension.

## 364 **Conclusions**

365 These findings compel the crucial and critical need for innovation and for the development of  
366 more effective interventions specifically to improve outcomes among those at the highest risk  
367 and in the most need. These findings also compel the urgent need for those developing  
368 mHealth interventions for hypertension control to engage high-risk and disproportionately  
369 burdened populations. Additionally, the evidence suggests that mHealth innovations should  
370 include more clinical decision support as opposed to self-management alone.

## 371 **Acknowledgments**

372 We would like to thank Evans Whitaker, MD, MLIS, and academic librarian for UCSF  
373 Health Science Library.

## 374 **Supplementary Materials**



## 375 Supplemental Material #1

| Section/topic             | #  | Checklist item                                                                                                                                                                                                                                                                                              | Reported on page # |
|---------------------------|----|-------------------------------------------------------------------------------------------------------------------------------------------------------------------------------------------------------------------------------------------------------------------------------------------------------------|--------------------|
| TITLE                     |    |                                                                                                                                                                                                                                                                                                             |                    |
| Title                     | 1  | Identify the report as a systematic review, meta-analysis, or both.                                                                                                                                                                                                                                         | 1                  |
| ABSTRACT                  |    |                                                                                                                                                                                                                                                                                                             |                    |
| Structured summary        | 2  | Provide a structured summary including, as applicable: background; objectives; data sources; study eligibility criteria, participants, and interventions; study appraisal and synthesis methods; results; limitations; conclusions and implications of key findings; systematic review registration number. | 3                  |
| INTRODUCTION              |    |                                                                                                                                                                                                                                                                                                             |                    |
| Rationale                 | 3  | Describe the rationale for the review in the context of what is already known.                                                                                                                                                                                                                              | 6-7                |
| Objectives                | 4  | Provide an explicit statement of questions being addressed with reference to participants, interventions, comparisons, outcomes, and study design (PICOS).                                                                                                                                                  | 6-7                |
| METHODS                   |    |                                                                                                                                                                                                                                                                                                             |                    |
| Protocol and registration | 5  | Indicate if a review protocol exists, if and where it can be accessed (e.g., Web address), and, if available, provide registration information including registration number.                                                                                                                               | N/A                |
| Eligibility criteria      | 6  | Specify study characteristics (e.g., PICOS, length of follow-up) and report characteristics (e.g., years considered, language, publication status) used as criteria for eligibility, giving rationale.                                                                                                      | 4-5                |
| Information sources       | 7  | Describe all information sources (e.g., databases with dates of coverage, contact with study authors to identify additional studies) in the search and date last searched.                                                                                                                                  | 8-10               |
| Search                    | 8  | Present full electronic search strategy for at least one database, including any limits used, such that it could be repeated.                                                                                                                                                                               | 8 and Appendix 1   |
| Study selection           | 9  | State the process for selecting studies (i.e., screening, eligibility, included in systematic review, and, if applicable, included in the meta-analysis).                                                                                                                                                   | 9 and Figure 1     |
| Data collection process   | 10 | Describe method of data extraction from reports (e.g., piloted forms, independently, in duplicate) and any processes for obtaining and confirming data from investigators.                                                                                                                                  | 10                 |
| Data items                | 11 | List and define all variables for which data were sought (e.g., PICOS, funding sources) and any assumptions and simplifications made.                                                                                                                                                                       | 10                 |



| Section/topic                      | #  | Checklist item                                                                                                                                                                                                         | Reported on page #        |
|------------------------------------|----|------------------------------------------------------------------------------------------------------------------------------------------------------------------------------------------------------------------------|---------------------------|
| Risk of bias in individual studies | 12 | Describe methods used for assessing risk of bias of individual studies (including specification of whether this was done at the study or outcome level), and how this information is to be used in any data synthesis. | 10                        |
| Summary measures                   | 13 | State the principal summary measures (e.g., risk ratio, difference in means).                                                                                                                                          | n/a                       |
| Synthesis of results               | 14 | Describe the methods of handling data and combining results of studies, if done, including measures of consistency (e.g., I <sup>2</sup> ) for each meta-analysis.                                                     | 11                        |
| Risk of bias across studies        | 15 | Specify any assessment of risk of bias that may affect the cumulative evidence (e.g., publication bias, selective reporting within studies).                                                                           | 10                        |
| Additional analyses                | 16 | Describe methods of additional analyses (e.g., sensitivity or subgroup analyses, meta-regression), if done, indicating which were pre-specified.                                                                       | n/a                       |
| <b>RESULTS</b>                     |    |                                                                                                                                                                                                                        |                           |
| Study selection                    | 17 | Give numbers of studies screened, assessed for eligibility, and included in the review, with reasons for exclusions at each stage, ideally with a flow diagram.                                                        | 9-10                      |
| Study characteristics              | 18 | For each study, present characteristics for which data were extracted (e.g., study size, PICOS, follow-up period) and provide the citations.                                                                           | 8 and Table 1 and Table 2 |
| Risk of bias within studies        | 19 | Present data on risk of bias of each study and, if available, any outcome level assessment (see item 12).                                                                                                              | 10-11                     |
| Results of individual studies      | 20 | For all outcomes considered (benefits or harms), present, for each study: (a) simple summary data for each intervention group (b) effect estimates and confidence intervals, ideally with a forest plot.               | 7-8 and table 3           |
| Synthesis of results               | 21 | Present results of each meta-analysis done, including confidence intervals and measures of consistency.                                                                                                                | 11                        |
| Risk of bias across studies        | 22 | Present results of any assessment of risk of bias across studies (see Item 15).                                                                                                                                        | 16                        |
| Additional analysis                | 23 | Give results of additional analyses, if done (e.g., sensitivity or subgroup analyses, meta-regression [see Item 16]).                                                                                                  | 14, 17 and Table 4        |
| <b>DISCUSSION</b>                  |    |                                                                                                                                                                                                                        |                           |
| Summary of evidence                | 24 | Summarize the main findings including the strength of evidence for each main outcome; consider their relevance to key groups (e.g., healthcare providers, users, and policy makers).                                   | 16                        |
| Limitations                        | 25 | Discuss limitations at study and outcome level (e.g., risk of bias), and at review-level (e.g., incomplete retrieval of identified research, reporting bias).                                                          | 18-19                     |
| Conclusions                        | 26 | Provide a general interpretation of the results in the context of other evidence, and implications for future                                                                                                          | 19-20                     |

| Section/topic | #  | Checklist item                                                                                                                             | Reported on page # |
|---------------|----|--------------------------------------------------------------------------------------------------------------------------------------------|--------------------|
|               |    | research.                                                                                                                                  |                    |
| FUNDING       |    |                                                                                                                                            |                    |
| Funding       | 27 | Describe sources of funding for the systematic review and other support (e.g., supply of data); role of funders for the systematic review. | n/a                |

376 Preferred Reporting Items for Systematic reviews and Meta-Analyses (PRISMA) Checklist

377 **Supplemental Material #3**

378 RedCap survey: <https://redcap.ucsf.edu/surveys/?s=FR93D3Y8K9>

379 **Supplemental Material #3**

| Database            | Search strategy                                                                                                                                                                                                                                                                                                                                                            |
|---------------------|----------------------------------------------------------------------------------------------------------------------------------------------------------------------------------------------------------------------------------------------------------------------------------------------------------------------------------------------------------------------------|
| MEDLINE® via PubMed | (High blood pressure [tiab] OR Hypertension [tiab] OR Uncontrolled blood pressure [tiab] OR Elevated blood pressure [tiab]) AND (mHealth [tiab] OR smartphone [mh] OR wearable [tiab] OR mobile device [tiab] OR Bluetooth [tiab] OR Wireless [tiab] OR technology [tiab] OR telehealth [tiab] OR telemedicine/methods [mh] OR eHealth [tiab] OR mobile applications*[mh]) |
| CINAHL®             | High blood pressure OR Hypertension OR Uncontrolled blood pressure OR Elevated blood pressure [ABSTRACT] AND mHealth OR smartphone [mh] OR wearable OR mobile device OR Bluetooth OR Wireless OR technology OR telehealth OR telemedicine/methods [mh] OR eHealth OR mobile applications*[mh] [ABSTRACT]                                                                   |
| PsychInfo           | High blood pressure OR Hypertension OR Uncontrolled blood pressure OR Elevated blood pressure [ABSTRACT] AND mHealth OR smartphone [mh] OR wearable OR mobile device OR Bluetooth OR Wireless OR technology OR telehealth OR telemedicine/methods [mh] OR eHealth OR mobile applications*[mh] [ABSTRACT]                                                                   |
| EMBASE              | High blood pressure OR Hypertension OR Uncontrolled blood pressure OR Elevated blood pressure [TITLE or ABSTRACT] AND mHealth OR smartphone [mh] OR wearable OR mobile device OR Bluetooth OR Wireless OR technology OR telehealth OR telemedicine/methods [mh] OR eHealth OR mobile applications*[mh][TITLE or ABSTRACT]                                                  |

380 Preferred Reporting Items for Systematic reviews and Meta-Analyses (PRISMA) Checklist

381 **Supplemental Material #4**

Table 3: Study Outcomes and Effects.

| Study                 | Outcomes                                                           | Effects                                                                                                                                                                                                                                                                                                                                                                                                                                                |
|-----------------------|--------------------------------------------------------------------|--------------------------------------------------------------------------------------------------------------------------------------------------------------------------------------------------------------------------------------------------------------------------------------------------------------------------------------------------------------------------------------------------------------------------------------------------------|
| Schroeder et al, 2020 | Change in mean SBP at 12 months                                    | No significant differences were found for change in SBP at 12 months                                                                                                                                                                                                                                                                                                                                                                                   |
| Still et al, 2020     | Change in mean SBP and DBP at 3 months                             | No significant differences were found for change in SBP or DBP at 3 months                                                                                                                                                                                                                                                                                                                                                                             |
| Chandler et al, 2019  | Change in mean SBP at 6 months                                     | Mean SBP was significantly lower in the SMASH (121.8mmHg) vs ESC groups at 9 months (145.7mmHg) ( $P < 0.01$ ).                                                                                                                                                                                                                                                                                                                                        |
| Skolarus et al, 2018  | Change in mean SBP and DBP at 6 months                             | Mean SBP and DBP are not significantly lower in the control group ( $162.2 \pm 20.5$ , $99.2 \pm 17.8$ ) vs intervention group ( $160.7 \pm 23.6$ , $99.0 \pm 11.8$ ) at 6 months                                                                                                                                                                                                                                                                      |
| Tobe et al, 2018      | Change in mean SBP and DBP from BL to last 2 months of measurement | No significant differences were found for change in SBP or DBP from BL to final measurement                                                                                                                                                                                                                                                                                                                                                            |
| Frias et al, 2017     | Change in mean SBP at week 4                                       | At week 4, combined DMO had a mean change in SBP from baseline of $-21.8$ (SE 1.5) mm Hg compared to $-12.7$ (SE 2.8) mm Hg for usual care (combined DMO–usual care: mean $-9.1$ , SE 2.9, 95% CI $-14.8$ to $-3.3$ mm Hg; ICC=0; adjusted difference: mean $-10.0$ , SE 3.1, 95% CI $-16.1$ to $-3.9$ mm Hg; effect size=0.69                                                                                                                         |
| Davidson et al, 2015  | Change in mean SBP and DBP at 3 and at 6 months                    | Mean SBP and DBP are significantly lower in the SMASH group (SBP: $120 \pm 5$ ; DBP: $71 \pm 5$ ) vs ESC group (SBP: $145 \pm 5$ ; DBP: $84 \pm 5$ ) at 3 months and 6 months ( $P < 0.001$ ).                                                                                                                                                                                                                                                         |
| McManus et al, 2010   | Change in mean SBP at 6 months and 12 months                       | Overall difference in mean SBP reduction between self-management and usual care was 3.7 mm Hg (95% CI 0.8–6.6; $p=0.013$ ) at 6 mo and 5.4 mmHg (95% CI 2.4–8.5; $p=0.0004$ ) at 12 mo<br>Difference in mean SBP reduction for low IMD 2007 score (5.3 mm Hg, 95% CI 1.9–8.8, at 6 mo; 7.0 mm Hg, 3.5–10.6, at 12 mo) vs high IMD 2007 score ( $-0.4$ mm Hg, $-5.9$ to $5.2$ , at 6 mo; 1.6 mm Hg, $-4.4$ to $7.6$ , at 12 mo; $p=0.05$ and $p=0.08$ ) |

## 384 References

- 385 1. Collaborators GBDRF. Global, regional, and national comparative risk assessment of 79 behavioural, environmental and  
386 occupational, and metabolic risks or clusters of risks, 1990-2015: a systematic analysis for the Global Burden of Disease Study  
387 2015. *Lancet*. 2016;388(10053):1659-1724.
- 388 2. Danaei G, Ding EL, Mozaffarian D, et al. The preventable causes of death in the United States: comparative risk assessment of  
389 dietary, lifestyle, and metabolic risk factors. *PLoS Med*. 2009;6(4):e1000058.
- 390 3. Muntner P, Carey RM, Gidding S, et al. Potential US Population Impact of the 2017 ACC/AHA High Blood Pressure Guideline.  
391 *Circulation*. 2018;137(2):109-118.
- 392 4. Whelton PK, Carey RM, Aronow WS, et al. 2017 ACC/AHA/AAPA/ABC/ACPM/AGS/APhA/ASH/ASPC/NMA/PCNA  
393 Guideline for the Prevention, Detection, Evaluation, and Management of High Blood Pressure in Adults: Executive Summary: A  
394 Report of the American College of Cardiology/American Heart Association Task Force on Clinical Practice Guidelines.  
395 *Circulation*. 2018;138(17):e426-e483.
- 396 5. Fryar CD, Ostchega Y, Hales CM, Zhang G, Kruszon-Moran D. Hypertension Prevalence and Control Among Adults: United  
397 States, 2015-2016. *NCHS Data Brief*. 2017(289):1-8.
- 398 6. Zha P, Qureshi R, Porter S, et al. Utilizing a Mobile Health Intervention to Manage Hypertension in an Underserved Community.  
399 *West J Nurs Res*. 2020;42(3):201-209.
- 400 7. Abebe NA, Capozza KL, Des Jardins TR, et al. Considerations for community-based mHealth initiatives: insights from three  
401 Beacon Communities. *J Med Internet Res*. 2013;15(10):e221.
- 402 8. WHO Global Observatory for eHealth, & World Health Organization. *MHealth: New horizons for health through mobile  
403 technologies*. Geneva: World Health Organization;2011.
- 404 9. Mobile Fact Sheet. <https://www.pewresearch.org/internet/fact-sheet/mobile/>. Pew Research Center. 2021. Accessed May 22,  
405 2021.
- 406 10. Kelli HM, Witbrodt B, Shah A. The Future of Mobile Health Applications and Devices in Cardiovascular Health. *Euro Med J  
407 Innov*. 2017;2017:92-97.
- 408 11. Boulos MN, Brewer AC, Karimkhani C, Buller DB, Dellavalle RP. Mobile medical and health apps: state of the art, concerns,  
409 regulatory control and certification. *Online J Public Health Inform*. 2014;5(3):229.
- 410 12. Li R, Liang N, Bu F, Hesketh T. The Effectiveness of Self-Management of Hypertension in Adults Using Mobile Health:  
411 Systematic Review and Meta-Analysis. *JMIR Mhealth Uhealth*. 2020;8(3):e17776.
- 412 13. Lu X, Yang H, Xia X, et al. Interactive Mobile Health Intervention and Blood Pressure Management in Adults. *Hypertension*.  
413 2019;74(3):697-704.
- 414 14. Buis L, Hirzel L, Dawood RM, et al. Text Messaging to Improve Hypertension Medication Adherence in African Americans  
415 From Primary Care and Emergency Department Settings: Results From Two Randomized Feasibility Studies. *JMIR Mhealth  
416 Uhealth*. 2017;5(2):e9.
- 417 15. Azar K, Pletcher M, Fontil V, Faulkner M. Effectiveness of mHealth Interventions for Blood Pressure Control Among  
418 Vulnerable Populations: A Systematic Review. *PROSPERO*.  
419 [https://www.crd.york.ac.uk/prospero/display\\_record.php?ID=CRD42020169115](https://www.crd.york.ac.uk/prospero/display_record.php?ID=CRD42020169115). Accessed May 22, 2021.
- 420 16. Moher D, Liberati A, Tetzlaff J, Altman DG, Group P. Preferred reporting items for systematic reviews and meta-analyses: the  
421 PRISMA statement. *J Clin Epidemiol*. 2009;62(10):1006-1012.
- 422 17. Whelton PK, Carey RM, Aronow WS, et al. 2017 ACC/AHA/AAPA/ABC/ACPM/AGS/APhA/ASH/ASPC/NMA/PCNA  
423 Guideline for the Prevention, Detection, Evaluation, and Management of High Blood Pressure in Adults: A Report of the  
424 American College of Cardiology/American Heart Association Task Force on Clinical Practice Guidelines. *J Am Coll Cardiol*.  
425 2018;71(19):e127-e248.
- 426 18. World Health Organization. *mHealth: new horizons for health through mobile technologies* Geneva, Switzerland 2011. - add  
427 website & date accessed (Organization site reference - e.g., ISSN International Centre: The ISSN register. <http://www.issn.org>  
428 (2006). Accessed 20 Feb 2007.

- 429 19. Burke LE, Ma J, Azar KM, et al. Current Science on Consumer Use of Mobile Health for Cardiovascular Disease Prevention: A  
430 Scientific Statement From the American Heart Association. *Circulation*. 2015;132(12):1157-1213.
- 431 20. McManus RJ, Mant J, Bray EP, et al. Telemonitoring and self-management in the control of hypertension (TASMINH2): a  
432 randomised controlled trial. *Lancet*. 2010;376(9736):163-172.
- 433 21. Tobe SW, Yeates K, Campbell NRC, et al. Diagnosing hypertension in Indigenous Canadians (DREAM-GLOBAL): A  
434 randomized controlled trial to compare the effectiveness of short message service messaging for management of hypertension:  
435 Main results. *J Clin Hypertens (Greenwich)*. 2019;21(1):29-36.
- 436 22. Frias J, Virdi N, Raja P, Kim Y, Savage G, Osterberg L. Effectiveness of Digital Medicines to Improve Clinical Outcomes in  
437 Patients with Uncontrolled Hypertension and Type 2 Diabetes: Prospective, Open-Label, Cluster-Randomized Pilot Clinical  
438 Trial. *J Med Internet Res*. 2017;19(7):e246.
- 439 23. Skolarus LE, Cowdery J, Dome M, et al. Reach Out Churches: A Community-Based Participatory Research Pilot Trial to Assess  
440 the Feasibility of a Mobile Health Technology Intervention to Reduce Blood Pressure Among African Americans. *Health  
441 promotion practice*. 2018;19(4):495-505.
- 442 24. Schroeder EB, Moore KR, Manson SM, et al. A randomized clinical trial of an interactive voice response and text message  
443 intervention for individuals with hypertension. *Journal of Clinical Hypertension*. 2020;22(7):1228-1238.
- 444 25. Davidson TM, McGillicuddy J, Mueller M, et al. Evaluation of an mHealth Medication Regimen Self-Management Program for  
445 African American and Hispanic Uncontrolled Hypertensives. *J Pers Med*. 2015;5(4):389-405.
- 446 26. Still CH, Margevicius S, Harwell C, et al. A Community and Technology-Based Approach for Hypertension Self-Management  
447 (COACHMAN) to Improve Blood Pressure Control in African Americans: Results from a Pilot Study. *Patient Prefer Adherence*.  
448 2020;14:2301-2313.
- 449 27. Chandler J, Sox L, Kellam K, Feder L, Nemeth L, Treiber F. Impact of a Culturally Tailored mHealth Medication Regimen Self-  
450 Management Program upon Blood Pressure among Hypertensive Hispanic Adults. *Int J Environ Res Public Health*. 2019;16(7).
- 451 28. Ng JY, Ntoumanis N, Thøgersen-Ntoumani C, et al. Self-Determination Theory Applied to Health Contexts: A Meta-Analysis.  
452 *Perspect Psychol Sci*. 2012;7(4):325-340.
- 453 29. Deci EL, Koestner R, Ryan RM. A meta-analytic review of experiments examining the effects of extrinsic rewards on intrinsic  
454 motivation. *Psychol Bull*. 1999;125(6):627-668; discussion 692-700.
- 455 30. Still CH, Margevicius S, Harwell C, et al. A community and technology-based approach for hypertension self-management  
456 (Coachman) to improve blood pressure control in african americans: Results from a pilot study. *Patient Preference and  
457 Adherence*. 2020;14:2301-2313.
- 458 31. Davidson TM, McGillicuddy J, Mueller M, et al. Evaluation of an mHealth Medication Regimen Self-Management Program for  
459 African American and Hispanic Uncontrolled Hypertensives. *Journal of Personalized Medicine*. 2015;5(4):389-405.
- 460 32. Alessa T, Abdi S, Hawley MS, de Witte L. Mobile Apps to Support the Self-Management of Hypertension: Systematic Review  
461 of Effectiveness, Usability, and User Satisfaction. *JMIR Mhealth Uhealth*. 2018;6(7):e10723.
- 462 33. Xiong S, Berkhouse H, Schooler M, et al. Effectiveness of mHealth Interventions in Improving Medication Adherence Among  
463 People with Hypertension: a Systematic Review. *Curr Hypertens Rep*. 2018;20(10):86.
- 464 34. Vargas G, Cajita MI, Whitehouse E, Han HR. Use of Short Messaging Service for Hypertension Management: A Systematic  
465 Review. *J Cardiovasc Nurs*. 2017;32(3):260-270.
- 466 35. McLean G, Band R, Saunderson K, et al. Digital interventions to promote self-management in adults with hypertension  
467 systematic review and meta-analysis. *J Hypertens*. 2016;34(4):600-612.
- 468 36. Mohammadi R, Ayatollahi Tafti M, Hoveidamanesh S, Ghanavati R, Pournik O. Reflection on Mobile Applications for Blood  
469 Pressure Management: A Systematic Review on Potential Effects and Initiatives. *Stud Health Technol Inform*. 2018;247:306-  
470 310.
- 471 37. Andre N, Wibawanti R, Siswanto BB. Mobile Phone-Based Intervention in Hypertension Management. *Int J Hypertens*.  
472 2019;2019:9021017.
- 473 38. Mileski M, Kruse CS, Catalani J, Haderer T. Adopting Telemedicine for the Self-Management of Hypertension: Systematic  
474 Review. *JMIR Med Inform*. 2017;5(4):e41.

- 475 39. Li R, Liang N, Bu F, Hesketh T. The Effectiveness of Self-Management of Hypertension in Adults Using Mobile Health: Systematic Review and Meta-Analysis. *JMIR mHealth and uHealth*. 2020;8(3):e17776.  
476
- 477 40. Khoong EC, Olazo K, Rivadeneira NA, et al. Mobile health strategies for blood pressure self-management in urban populations with digital barriers: systematic review and meta-analyses. *NPJ Digit Med*. 2021;4(1):114.  
478
- 479 41. Doshi R, Aseltine RH, Sabina AB, Graham GN. Interventions to Improve Management of Chronic Conditions Among Racial and Ethnic Minorities. *J Racial Ethn Health Disparities*. 2017;4(6):1033-1041.  
480
- 481 42. Staessen JA, Den Hond E, Celis H, et al. Antihypertensive treatment based on blood pressure measurement at home or in the physician's office: a randomized controlled trial. *JAMA*. 2004;291(8):955-964.  
482
- 483 43. Verberk WJ, Kroon AA, Lenders JW, et al. Self-measurement of blood pressure at home reduces the need for antihypertensive drugs: a randomized, controlled trial. *Hypertension*. 2007;50(6):1019-1025.  
484
- 485 44. McManus RJ, Mant J, Franssen M, et al. Efficacy of self-monitored blood pressure, with or without telemonitoring, for titration of antihypertensive medication (TASMINH4): an unmasked randomised controlled trial. *Lancet*. 2018;391(10124):949-959.  
486
- 487 45. Stoddart A, Hanley J, Wild S, et al. Telemonitoring-based service redesign for the management of uncontrolled hypertension (HITS): cost and cost-effectiveness analysis of a randomised controlled trial. *BMJ Open*. 2013;3(5).  
488
- 489 46. Bray EP, Holder R, Mant J, McManus RJ. Does self-monitoring reduce blood pressure? Meta-analysis with meta-regression of randomized controlled trials. *Ann Med*. 2010;42(5):371-386.  
490
- 491 47. Ferdinand DP, Nedunchezian S, Ferdinand KC. Hypertension in African Americans: Advances in community outreach and public health approaches. *Prog Cardiovasc Dis*. 2020;63(1):40-45.  
492
- 493 48. Zhang X, Hailu B, Tabor DC, et al. Role of Health Information Technology in Addressing Health Disparities: Patient, Clinician, and System Perspectives. *Med Care*. 2019;57 Suppl 6 Suppl 2:S115-S120.  
494
- 495 49. Brewer LC, Hayes SN, Caron AR, et al. Promoting cardiovascular health and wellness among African-Americans: Community participatory approach to design an innovative mobile-health intervention. *PLoS One*. 2019;14(8):e0218724.  
496
- 497 50. Lewinski AA, Patel UD, Diamantidis CJ, et al. Addressing Diabetes and Poorly Controlled Hypertension: Pragmatic mHealth Self-Management Intervention. *J Med Internet Res*. 2019;21(4):e12541.  
498
- 499 51. Taber DJ, Gebregziabher M, Posadas A, Schaffner C, Egede LE, Baliga PK. Pharmacist-Led, Technology-Assisted Study to Improve Medication Safety, Cardiovascular Risk Factor Control, and Racial Disparities in Kidney Transplant Recipients. *J Am Coll Clin Pharm*. 2018;1(2):81-88.  
500  
501
